# Supplementary material for: Amidinate aluminium complexes: synthesis, characterization and ring-opening polymerization of rac-lactide
Source: Royal Society of Chemistry journal article supplement (doi:10.1039/c0dt00272k), 2010-01-01
Supplement: c0dt00272k.pdf [file c0dt00272k.pdf]

## **Electronic Supplementary Information**

Amidinate Aluminum Complexes: Synthesis, Characterization and  
Ring-Opening Polymerization of *rac*-Lactide

Feng Qian, Keyin Liu and Haiyan Ma\*

Laboratory of Organometallic Chemistry, East China University of Science and  
Technology, 130 Meilong Road, Shanghai 200237, P. R. China

## Contents

**Figure S1.** Schematic presentation of the core structures of amidinate aluminum complexes (angles ( $^{\circ}$ ), bond length ( $\text{\AA}$ )).

**Figure S2.** The  $^1\text{H}$  NMR spectra of ligand **3a**, complex **4a** and complex **4a** with isopropanol.

**Figure S3.** The  $^1\text{H}$  NMR spectra of *rac*-LA polymerization initiated by complex **4c**.

**Figure S4.** Homonuclear decoupled  $^1\text{H}$  NMR spectrum of the methine region of PLA.

**Figure S5.** ESI-TOF mass spectrum of *rac*-lactide oligomer obtained with complex **4c**.

**Table S1.** The crystal data and structure refinement for complexes **4b**, **4c** and **5**.

**Table S2.** The selected bond lengths ( $\text{\AA}$ ) and bond angles ( $^{\circ}$ ) for complex **5**.

**Table S3.** The selected bond lengths ( $\text{\AA}$ ) and bond angles ( $^{\circ}$ ) for complexes **4b** and **4c**.

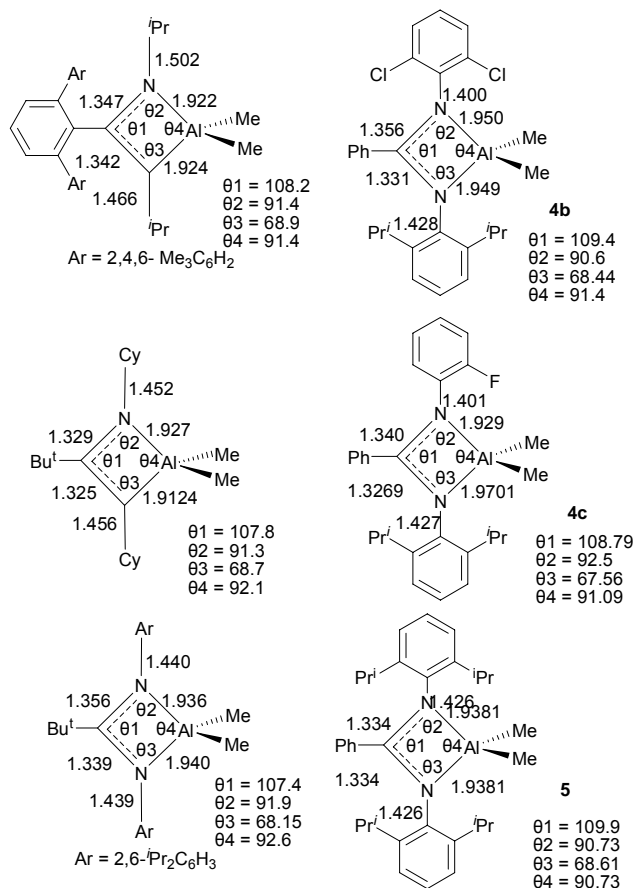

**Figure S1.** Schematic presentation of the core structures of amidinate aluminum complexes (angles ( $^\circ$ ), bond length ( $\text{\AA}$ )).

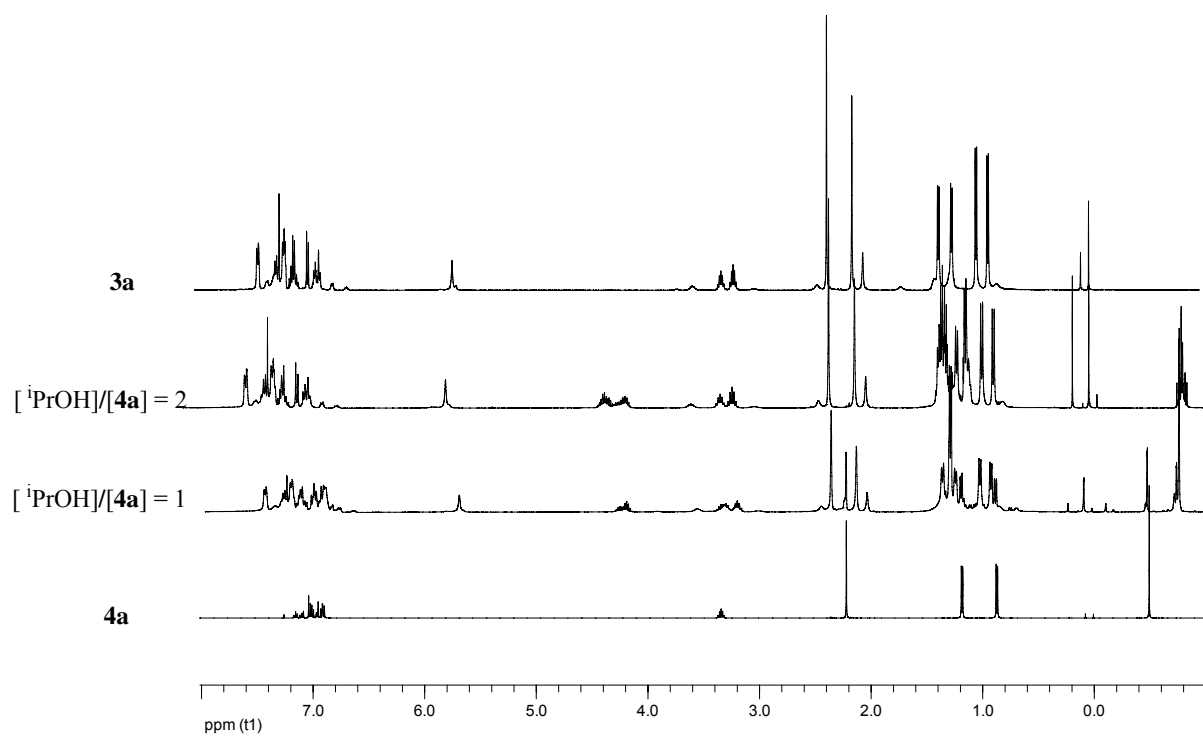

**Figure S2.** The  $^1\text{H}$  NMR spectra of ligand **3a**, complex **4a** and complex **4a** with isopropanol ( $\text{CDCl}_3$ , 400 MHz).

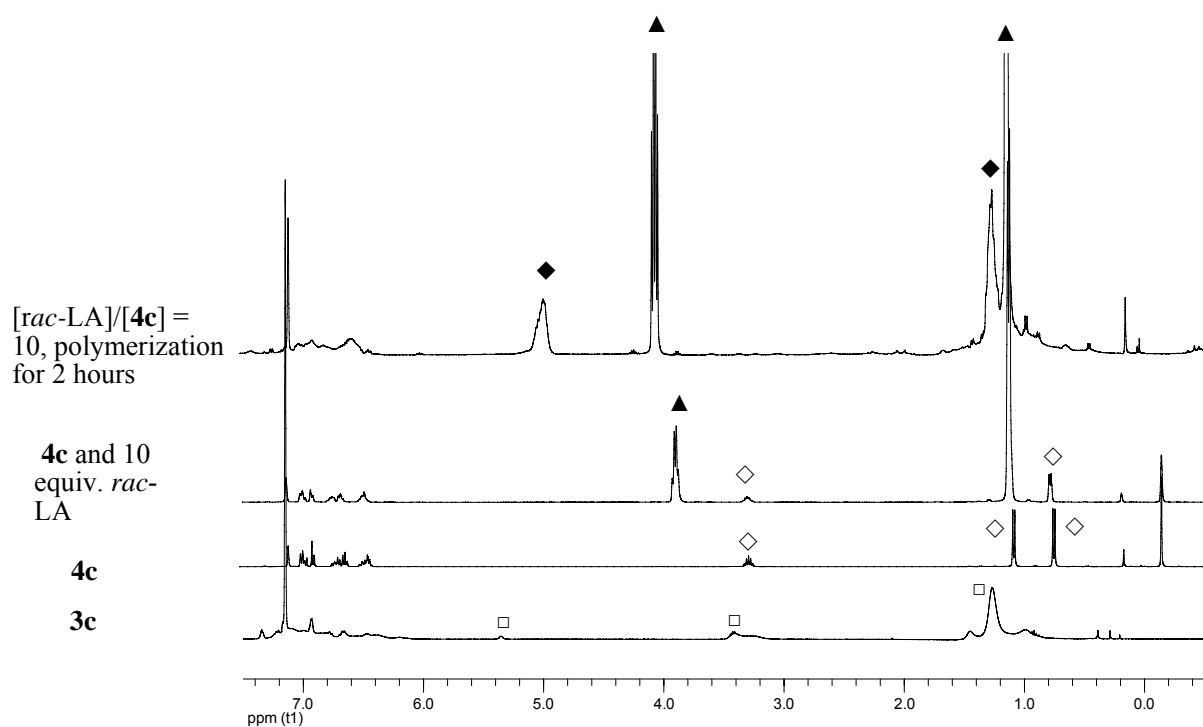

**Figure S3.**  $^1\text{H}$  NMR spectra of *rac*-LA polymerization initiated by complex **4c** ( $[\textit{rac}\text{-LA}]_0/[\text{Al}]_0 = 10$ ,  $70\text{ }^\circ\text{C}$ , in  $\text{C}_6\text{D}_6$ ) ( $\square$ : The proton signals of ligand **3c**,  $\diamond$ : The proton signals of complex **4c**,  $\blacktriangle$ : The proton signals of *rac*-lactide,  $\blacklozenge$ : The proton signals of poly-lactide).

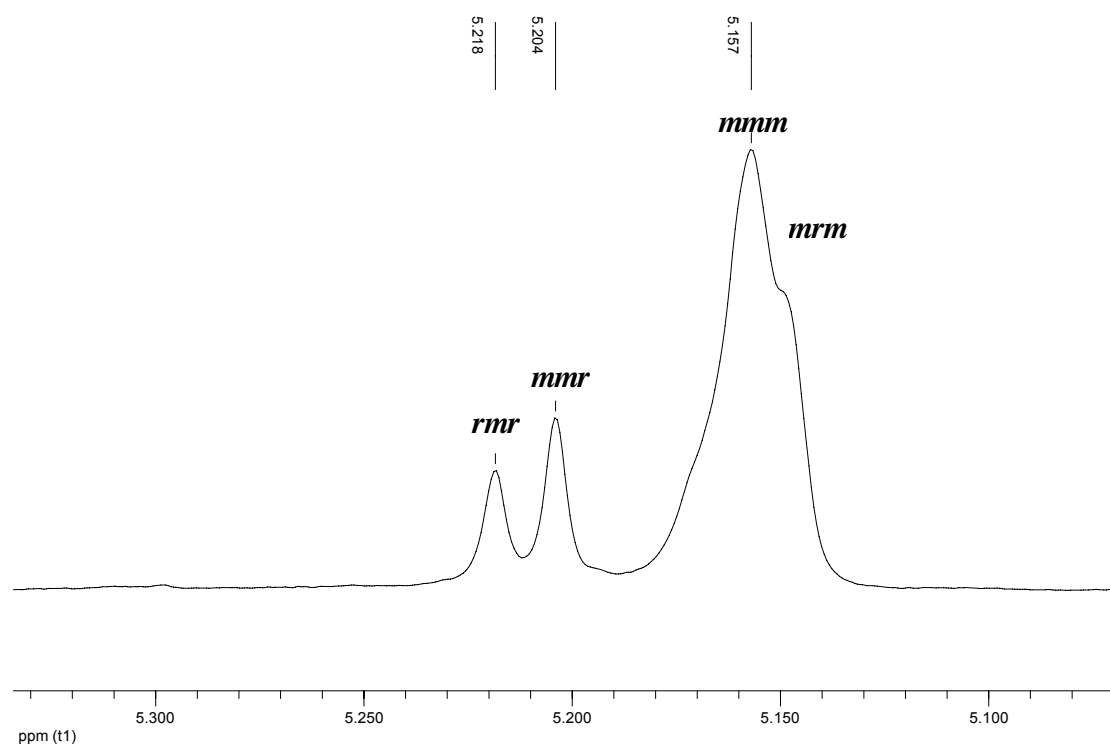

**Figure S4.** Homonuclear decoupled  $^1\text{H}$  NMR spectrum of the methine region of PLA prepared with **4a**/*rac*-lactide at 70 °C for 12 h (500 MHz,  $\text{CDCl}_3$ ).

$$\# = 16.05 + 72.07n$$

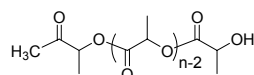

$$\Delta = 374.49 + 72.07n$$

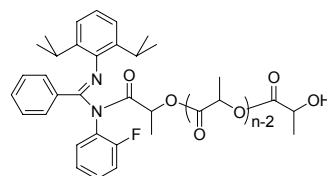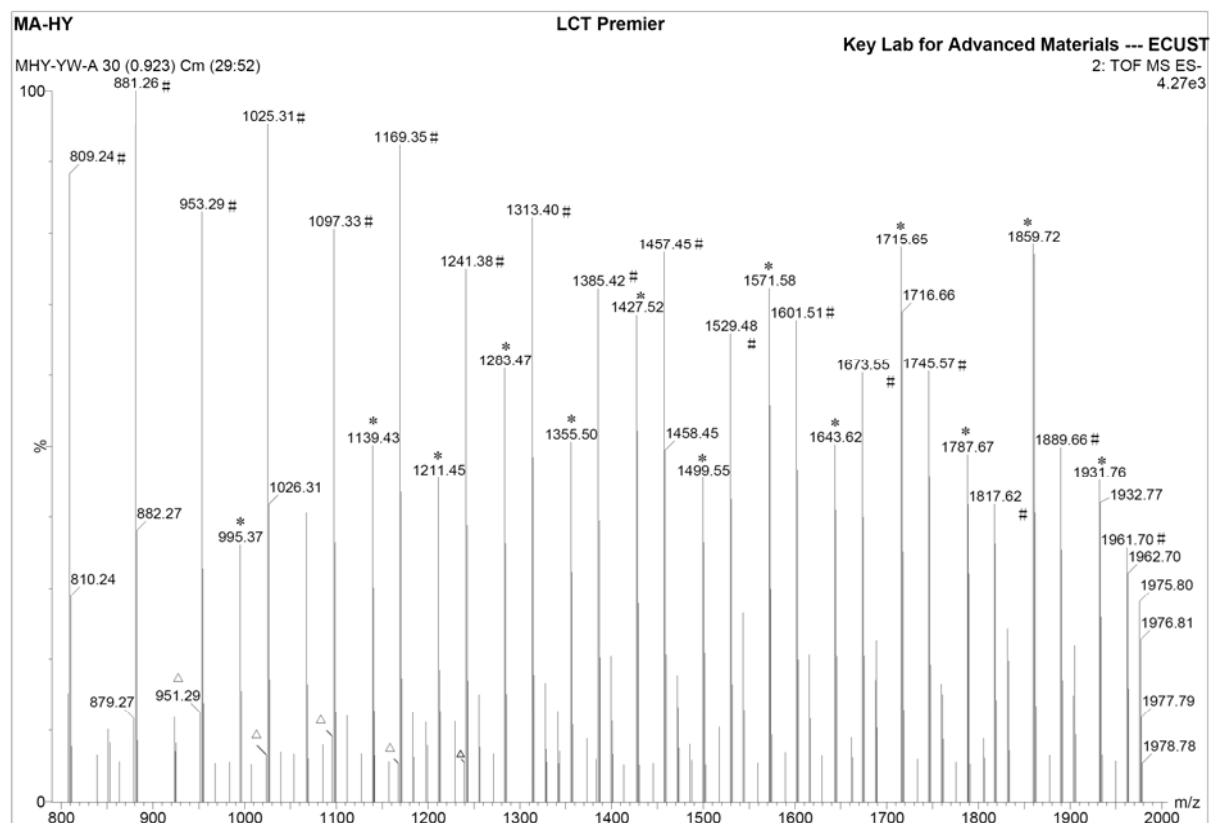

**Figure S5.** ESI-TOF mass spectrum of *rac*-lactide oligomer obtained with complex **4c** (in toluene at 70 °C,  $[\textit{rac}\text{-LA}]_0/[\text{Al}]_0 = 10$ ,  $[\textit{rac}\text{-LA}]_0 = 1 \text{ mol/L}$ ).<sup>a</sup>

<sup>a</sup>: Currently, we have no reasonable explanation for the series marked with \*, which correspond to oligomers end-capped with certain group having mass of  $58 + 72.07m$ .

**Table S1.** The crystal data and structure refinement for complexes **4b**, **4c** and **5**

|                                                     | <b>4b</b>                                                         | <b>4c</b>                                                         | <b>5</b>                                                          |
|-----------------------------------------------------|-------------------------------------------------------------------|-------------------------------------------------------------------|-------------------------------------------------------------------|
| Empirical formula                                   | C <sub>27</sub> H <sub>31</sub> AlCl <sub>2</sub> N <sub>2</sub>  | C <sub>27</sub> H <sub>32</sub> AlFN <sub>2</sub>                 | C <sub>33</sub> H <sub>45</sub> AlN <sub>2</sub>                  |
| Formula weight                                      | 481.42                                                            | 430.53                                                            | 496.69                                                            |
| Crystal size/mm                                     | 0.27 × 0.25 × 0.20                                                | 0.39 × 0.37 × 0.32                                                | 0.30 × 0.26 × 0.22                                                |
| Crystal system                                      | Monoclinic                                                        | Triclinic                                                         | Trigonal                                                          |
| Space group                                         | C2/c                                                              | P-1                                                               | P3(2)21                                                           |
| <i>a</i> /Å                                         | 24.771(4)                                                         | 9.005(7)                                                          | 14.948 (8)                                                        |
| <i>b</i> /Å                                         | 14.720(2)                                                         | 10.674(8)                                                         | 14.948 (8)                                                        |
| <i>c</i> /Å                                         | 17.004(2)                                                         | 14.0804(11)                                                       | 12.2099(10)                                                       |
| <i>α</i> /°                                         | 90                                                                | 69.3390(10)                                                       | 90                                                                |
| <i>β</i> /°                                         | 118.966(3)                                                        | 83.1210(10)                                                       | 90                                                                |
| <i>γ</i> /°                                         | 90                                                                | 83.9360(10)                                                       | 120                                                               |
| Volume/Å <sup>3</sup>                               | 5424.8(13)                                                        | 1254.22(17)                                                       | 2362.8(3)                                                         |
| <i>Z</i>                                            | 8                                                                 | 2                                                                 | 3                                                                 |
| Calcd density (Mg/m <sup>3</sup> )                  | 1.179                                                             | 1.140                                                             | 1.047                                                             |
| Absorp coeff/mm <sup>-1</sup>                       | 0.288                                                             | 0.104                                                             | 0.086                                                             |
| F(000)                                              | 2032                                                              | 460                                                               | 810                                                               |
| <i>θ</i> range for data collection (°)              | 1.88 to 25.50                                                     | 2.04 to 27.00                                                     | 1.57 to 26.49                                                     |
| Limiting indices                                    | -29 ≤ <i>h</i> ≤ 28<br>-15 ≤ <i>k</i> ≤ 17<br>-20 ≤ <i>l</i> ≤ 19 | -11 ≤ <i>h</i> ≤ 11<br>-8 ≤ <i>k</i> ≤ 13<br>-17 ≤ <i>l</i> ≤ 17  | -18 ≤ <i>h</i> ≤ 16<br>-18 ≤ <i>k</i> ≤ 18<br>-15 ≤ <i>l</i> ≤ 15 |
| No. of reflns collected/unique                      | 13973/5054<br>( <i>R</i> <sub>int</sub> = 0.1262)                 | 7464/5331<br>( <i>R</i> <sub>int</sub> = 0.0330)                  | 13607/3273<br>( <i>R</i> <sub>int</sub> = 0.0519)                 |
| Data/retrains/parameters                            | 5054/0/296                                                        | 5331/0/286                                                        | 3273/0/170                                                        |
| Goodness-of-fit on F <sup>2</sup>                   | 0.842                                                             | 1.019                                                             | 1.118                                                             |
| Final <i>R</i> indices [ <i>I</i> > 2σ( <i>I</i> )] | <i>R</i> <sub>1</sub> = 0.0628<br><i>wR</i> <sub>2</sub> = 0.1218 | <i>R</i> <sub>1</sub> = 0.0511<br><i>wR</i> <sub>2</sub> = 0.1349 | <i>R</i> <sub>1</sub> = 0.0550<br><i>wR</i> <sub>2</sub> = 0.1186 |
| <i>R</i> indices (all data)                         | <i>R</i> <sub>1</sub> = 0.1676<br><i>wR</i> <sub>2</sub> = 0.1488 | <i>R</i> <sub>1</sub> = 0.0676<br><i>wR</i> <sub>2</sub> = 0.1444 | <i>R</i> <sub>1</sub> = 0.0619<br><i>wR</i> <sub>2</sub> = 0.1219 |
| Largest diff. peak and hole/e Å <sup>-3</sup>       | 0.242 and -0.247                                                  | 0.324 and -0.185                                                  | 0.332 and -0.160                                                  |



**Table S2.** The selected bond lengths (Å) and bond angles (°) for complex **5**

|           |            |            |            |
|-----------|------------|------------|------------|
| Al–N1     | 1.9381(18) | Al–C18     | 1.945(3)   |
| C1–N1     | 1.334(2)   | N1–C6      | 1.426(2)   |
| N1–Al–N1* | 68.61(9)   | Al–N1–C1   | 90.73(13)  |
| N1–C1–N1* | 109.9(2)   | C2–C1–Al   | 179.999(1) |
| N1–Al–C18 | 113.34(10) | N1–Al–C18* | 118.24(11) |

**Table S3.** The selected bond lengths (Å) and bond angles (°) for complexes **4b** and **4c**

|                | <b>4b</b> | <b>4c</b>  |
|----------------|-----------|------------|
| Al–N1          | 1.949(4)  | 1.9701(14) |
| Al–N2          | 1.950(4)  | 1.9290(14) |
| N1–C1          | 1.331(5)  | 1.3269(19) |
| N2–C1          | 1.356(5)  | 1.340(2)   |
| Al–C26         | 1.945(5)  | 1.944(2)   |
| Al–C27         | 1.937(6)  | 1.943(2)   |
| N1–C8          | 1.432(5)  | 1.427(2)   |
| N2–C20         | 1.402(5)  | 1.401(2)   |
| F...Al         | —         | 2.794      |
| N1–Al–N2       | 68.44(15) | 67.56(6)   |
| Al–N1–C1       | 91.4(3)   | 91.09(10)  |
| Al–N2–C1       | 90.6(3)   | 92.50(10)  |
| Al–N1–C8       | 142.4(3)  | 142.57(10) |
| Al–N2–C20      | 142.0(3)  | 135.85(12) |
| N1–C1–N2       | 109.4(4)  | 108.79(14) |
| N1–C1–C2       | 126.1(4)  | 124.51(14) |
| N2–C1–C2       | 124.4(4)  | 126.62(14) |
| C2–C1–Al       | 178.7(3)  | 175.96(11) |
| C26–Al–C27     | 120.4(3)  | 120.77(11) |
| Al–N2–C20–C25  | –84.8(6)  | –17.1(2)   |
| N2–C20–C25–Cl2 | –7.7(6)   | —          |
| N2–C20–C25–F   | —         | –1.5(2)    |
